# Supplementary material for: Genomic analysis of the class Phycisphaerae reveals a versatile group of complex carbon-degrading bacteria
Source: Research Square preprint supplement (doi:10.21203/rs.3.rs-3743515/v1), 2023-12-14
Supplement: Supplementary file 1 [file 789bf4fe71382a081a3e5445.docx]

**Genomic analysis of the class *Phycisphaerae* reveals a versatile group of complex carbon-degrading bacteria**

Wouter B. Lenferink, Mike S.M. Jetten, Maartje A.H.J. van Kessel, Sebastian Lücker*

Submitted to Antonie van Leeuwenhoek

**SUPPLEMENTARY INFORMATION**

**Table of contents**

- Supplementary Figure S1 – S4
- Supplementary Table S1 – S2

**Supplementary information
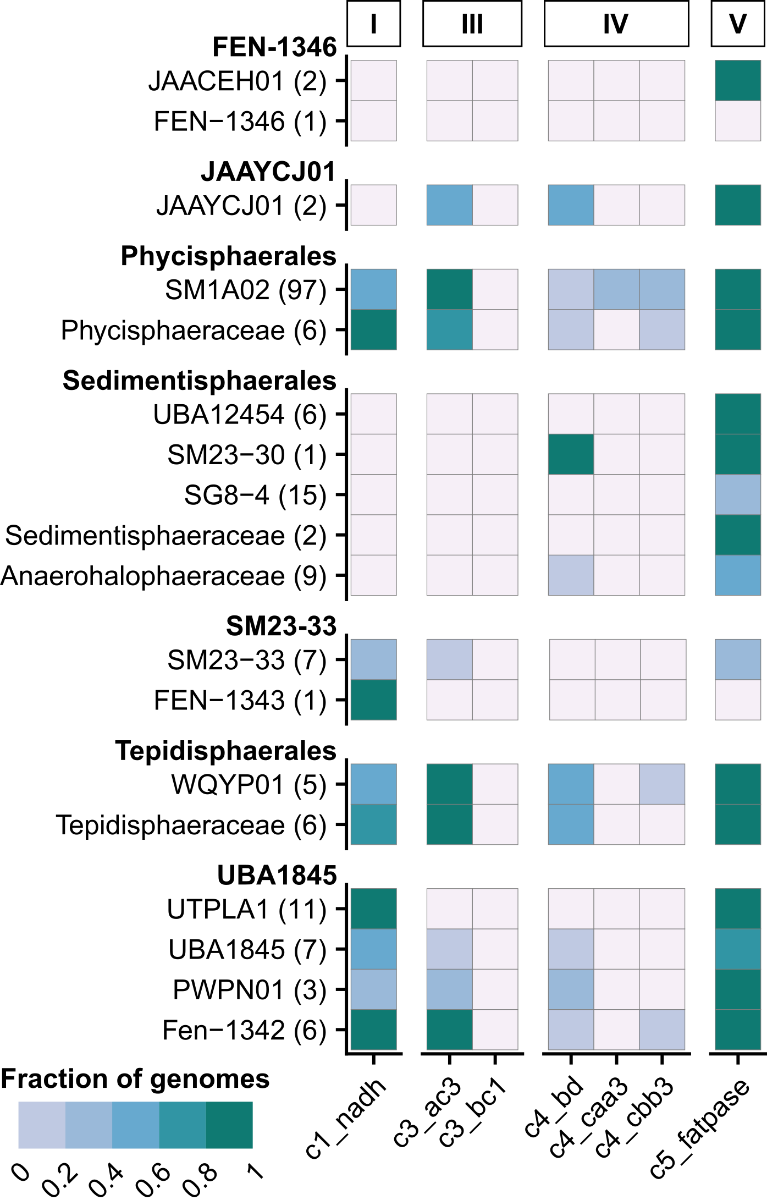
**

**Supplementary Figure 1.** Automatic and manually curated annotation of electron transfer chain (ETC) components, summarized for each *Phycisphaerae* family. From left to right, hits are displayed for the NADH dehydrogenase (c1_nadh), alternative complex III (c3_ac3), cytochrome *bc1* complex (c3_bc1), *bd*-type quinol oxidase (c4_bd), *caa*3-type cytochrome *c* oxidase (c4_caa3), *cbb*3-type cytochrome *c* oxidase (c4_cbb3), and the F-type ATPase (c5_fatpase).Numbers in parentheses behind family names represent the number of included genomes. Fill colour represents the fraction of genomes in a family predicted to encode the complete complex.


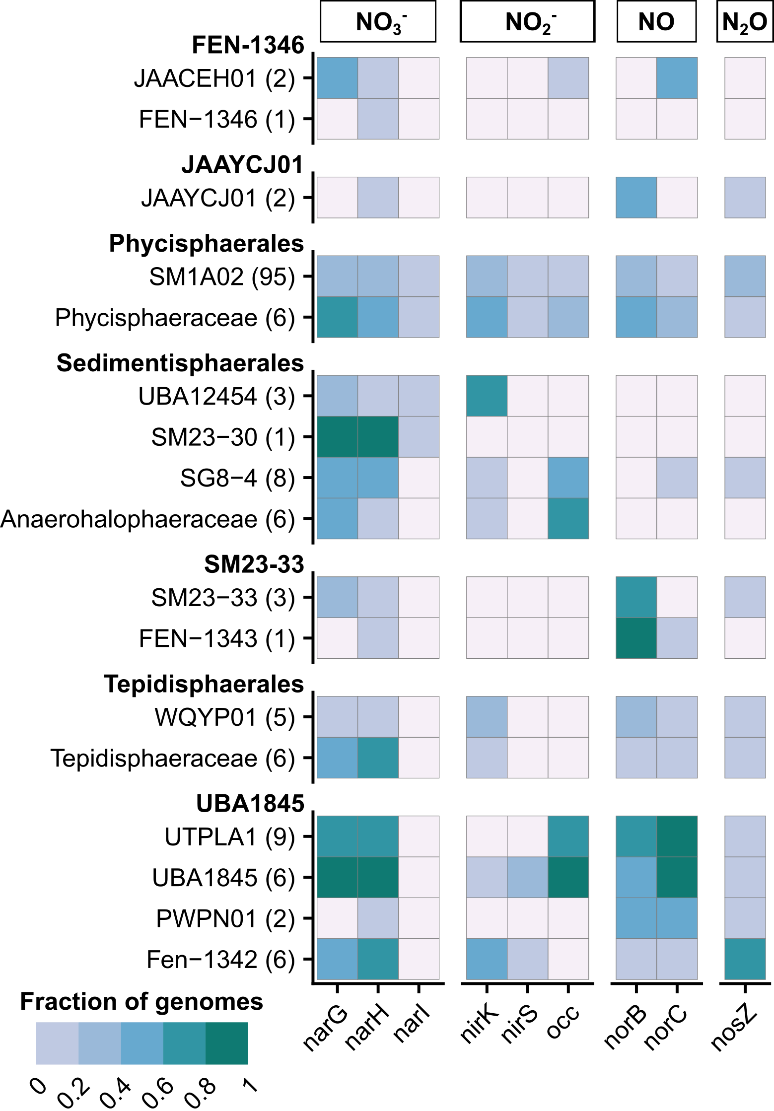


**Supplementary Figure 2.** Manually curated annotation of genes involved in denitrification, summarized for each *Phycisphaerae* family. From left to right, hits are displayed for nitrate (*narGHI*), nitrite (*nirK*, *nirS*, *occ*), nitric oxide (*norBC*), and nitrous oxide (*nosZ*) reduction.Numbers in parentheses behind family names represent the number of included genomes. Fill colours represent the fraction of genomes per family predicted to contain the respective gene.

**Supplementary Figure 3.** Manually curated annotation of genes involved in sulphur reduction, summarized for each *Phycisphaerae* family. From left to right, hits are displayed for sulfate (*aprAB*, *sat*) and sulphite (*asrABC*, *dsrAB*) reduction.Numbers in parentheses behind family names represent the number of included genomes. Fill colours represent the fraction of genomes per family predicted to contain the respective gene
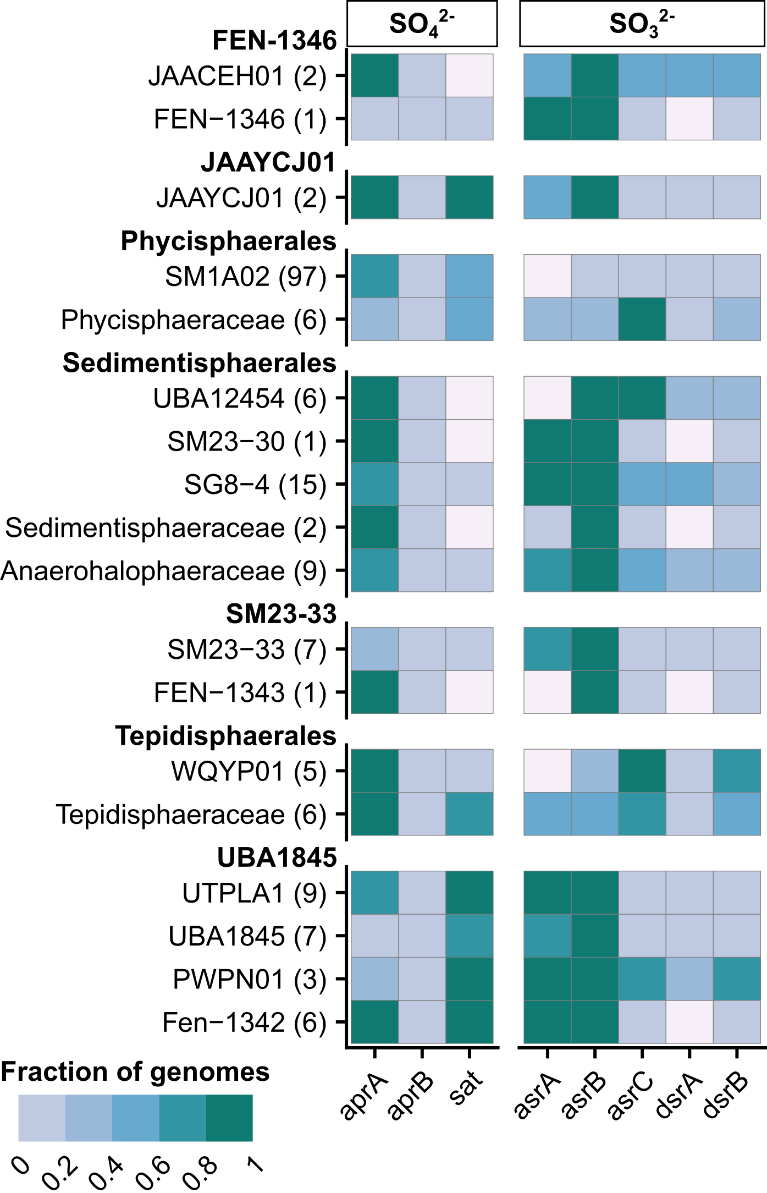
.

**
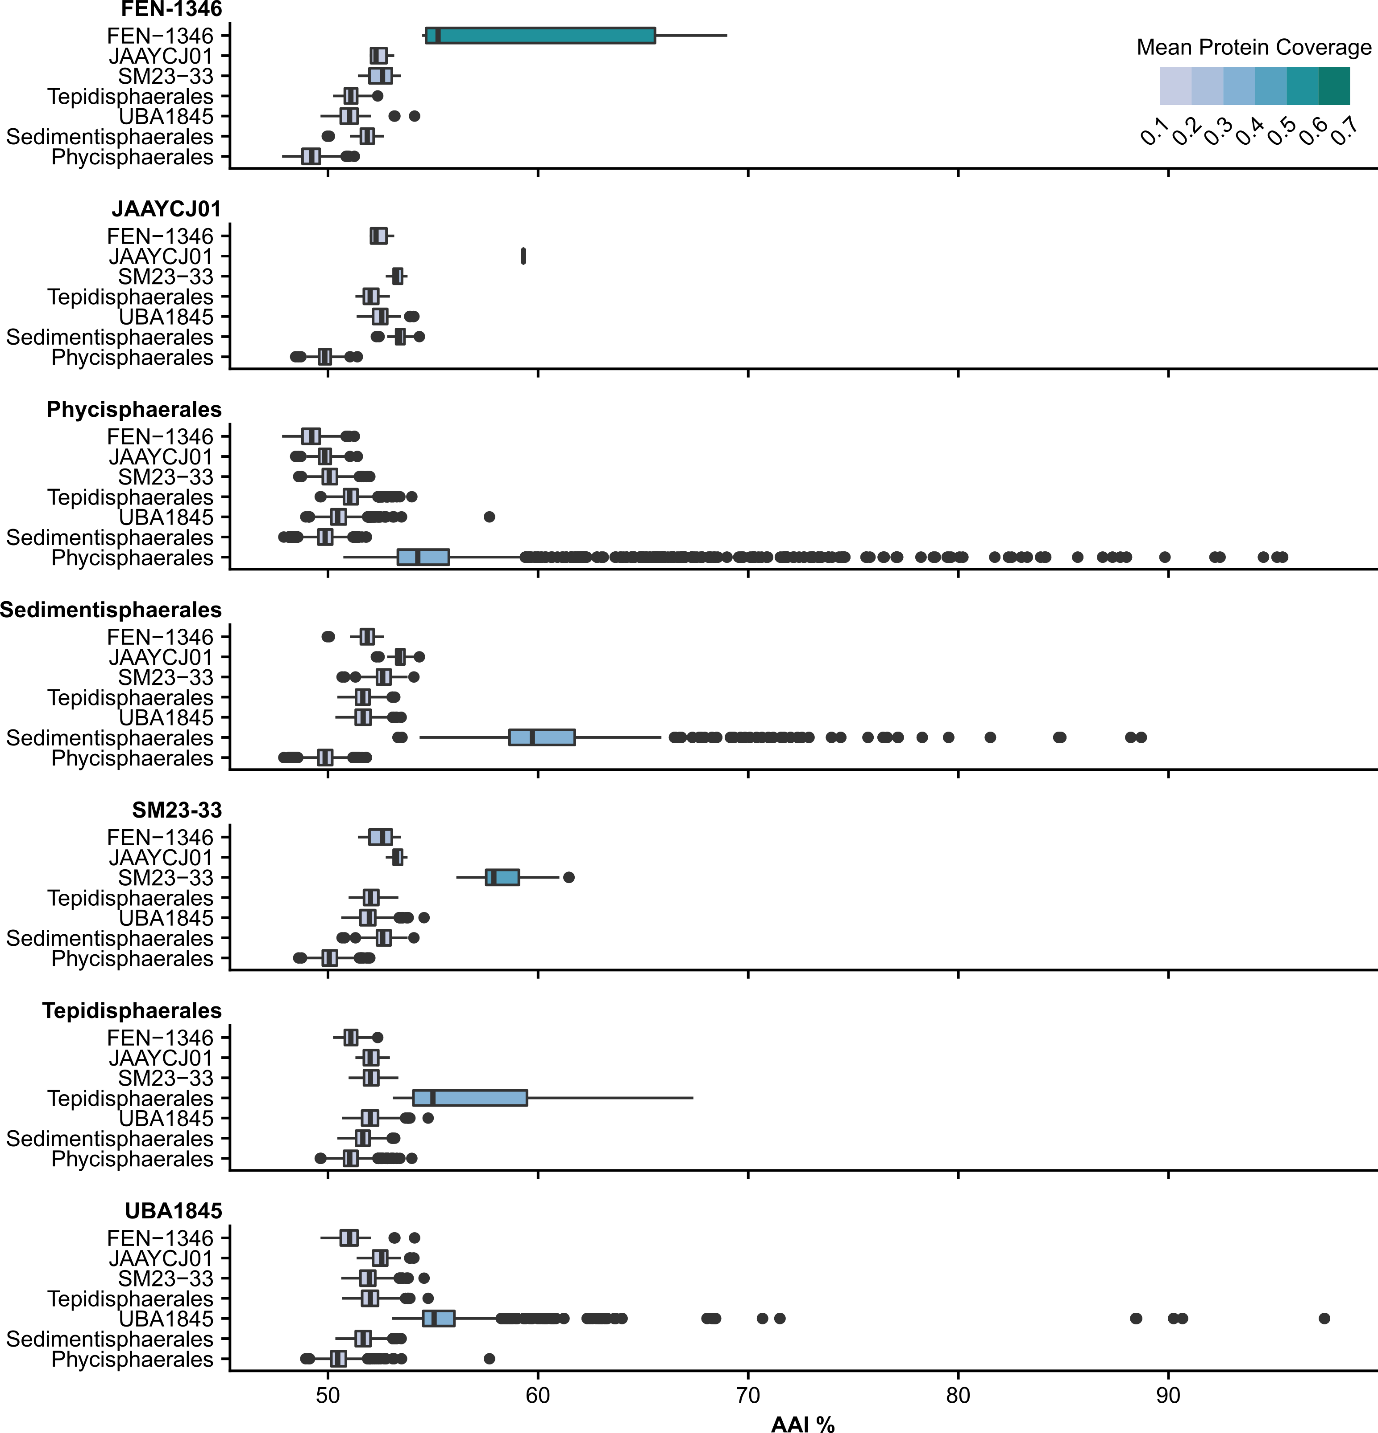
Supplementary Figure 4.** Average amino acid identity (AAI) comparisons between distinct *Phycisphaerae* orders. Names in bold indicate the respective order all other genomes were compared to.

| Table S1. Genome assemblies included in this study, corresponding CheckM statistics, and GTDB-Tk taxonomy. Asterisks indicate in-house genomes. | | | | | | | | | |
| --- | --- | --- | --- | --- | --- | --- | --- | --- | --- |
| Assembly | **Completeness** | **Contamination** | **Coding density** | **GC content** | **Size** | **Order** | **Family** | **Genus** | **Species** |
| AMOX_SL1* | 86.8% | 2.1% | 87.9% | 60.8% | 4.90 Mb | Phycisphaerales | SM1A02 | NA | AMOX_SL1 |
| AOM_BES5* | 91.5% | 1.6% | 86.3% | 65.6% | 4.29 Mb | UBA1845 | UBA1845 | SURF-32 | AOM_BES5 |
| AOM_Fe1* | 94.7% | 2.0% | 89.3% | 58.8% | 5.28 Mb | Sedimentisphaerales | Anaerohalophaeraceae | B28-G16 | AOM_Fe1 |
| COM_RAS1* | 89.1% | 1.6% | 86.7% | 66.1% | 5.50 Mb | UBA1845 | Fen-1342 | NA | COM_RAS1 |
| COM_RAS2* | 89.8% | 0.8% | 88.6% | 62.6% | 4.33 Mb | UBA1845 | UTPLA1 | PLA3 | COM_RAS2 |
| COM_TrWB2* | 83.7% | 2.1% | 87.1% | 65.8% | 4.20 Mb | Phycisphaerales | SM1A02 | UBA2396 | COM_TrWB2 |
| DAMOX_Bav1* | 87.1% | 0.4% | 87.0% | 60.6% | 5.04 Mb | UBA1845 | UTPLA1 | UTPLA1 | DAMOX_Bav1 |
| GCA_000284115.1 | 95.5% | 0.0% | 88.5% | 73.2% | 3.88 Mb | Phycisphaerales | Phycisphaeraceae | Phycisphaera | Phycisphaera mikurensis |
| GCA_001303465.1 | 71.6% | 0.0% | 88.2% | 54.8% | 4.46 Mb | Sedimentisphaerales | SG8-4 | SG8-4 | SG8-4 sp001303465 |
| GCA_001303665.1 | 75.0% | 1.1% | 88.5% | 67.8% | 3.43 Mb | SM23-33 | SM23-33 | SM23-33 | SM23-33 sp001303665 |
| GCA_001303695.1 | 70.8% | 0.0% | 87.5% | 51.0% | 4.01 Mb | Sedimentisphaerales | SM23-30 | SM23-30 | SM23-30 sp001303695 |
| GCA_001603075.1 | 100.0% | 1.1% | 89.3% | 62.8% | 5.65 Mb | Sedimentisphaerales | SG8-4 | PLanc-01 | PLanc-01 sp001603075 |
| GCA_001824635.1 | 87.3% | 1.7% | 86.3% | 49.5% | 2.62 Mb | Sedimentisphaerales | UBA12454 | GWF2-50-10 | GWF2-50-10 sp001824635 |
| GCA_001825665.1 | 97.7% | 1.1% | 90.6% | 41.0% | 4.83 Mb | Sedimentisphaerales | UBA12454 | UBA12454 | UBA12454 sp001825665 |
| GCA_001825675.1 | 92.1% | 3.4% | 88.6% | 42.0% | 4.86 Mb | Sedimentisphaerales | UBA12454 | UBA12454 | UBA12454 sp001825675 |
| GCA_001997385.1 | 98.9% | 1.1% | 89.4% | 46.2% | 2.95 Mb | Sedimentisphaerales | Sedimentisphaeraceae | Sedimentisphaera | Sedimentisphaera cyanobacteriorum |
| GCA_002084585.1 | 89.8% | 1.1% | 87.9% | 50.1% | 1.81 Mb | Sedimentisphaerales | Anaerohalophaeraceae | 4572-13 | 4572-13 sp002084585 |
| GCA_002117005.1 | 98.9% | 1.1% | 89.5% | 46.3% | 3.19 Mb | Sedimentisphaerales | Sedimentisphaeraceae | Sedimentisphaera | Sedimentisphaera salicampi |
| GCA_002167845.2 | 93.1% | 1.0% | 91.1% | 63.2% | 3.31 Mb | Phycisphaerales | SM1A02 | UBA12014 | UBA12014 sp002167845 |
| GCA_002171655.1 | 80.6% | 1.7% | 91.9% | 58.7% | 2.98 Mb | Phycisphaerales | SM1A02 | UBA8087 | UBA8087 sp002171655 |
| GCA_002295885.1 | 96.0% | 1.1% | 91.8% | 65.1% | 2.34 Mb | Phycisphaerales | SM1A02 | UBA854 | UBA854 sp002295885 |
| GCA_002311745.1 | 79.5% | 0.0% | 89.5% | 62.7% | 2.93 Mb | Tepidisphaerales | Tepidisphaeraceae | UBA1161 | UBA1161 sp002311745 |
| GCA_002327785.1 | 89.3% | 5.4% | 87.1% | 60.8% | 6.32 Mb | Sedimentisphaerales | SG8-4 | PLanc-01 | PLanc-01 sp002327785 |
| Table S1. Continued. | | | | | | | | | |
| GCA_002337545.1 | 88.5% | 0.0% | 87.5% | 59.0% | 3.53 Mb | Phycisphaerales | SM1A02 | UBA1924 | UBA1924 sp002337545 |
| GCA_002338715.1 | 91.4% | 3.4% | 85.6% | 57.0% | 5.25 Mb | UBA1845 | UBA1845 | UBA1845 | UBA1845 sp002338715 |
| GCA_002343075.1 | 92.2% | 3.4% | 87.5% | 59.6% | 4.47 Mb | Tepidisphaerales | Tepidisphaeraceae | UBA2421 | UBA2421 sp002343075 |
| GCA_002343325.1 | 81.7% | 1.1% | 89.0% | 67.2% | 3.13 Mb | Phycisphaerales | SM1A02 | UBA2396 | UBA2396 sp002343325 |
| GCA_002347125.1 | 87.3% | 4.6% | 88.8% | 62.3% | 4.76 Mb | Sedimentisphaerales | SG8-4 | UBA2266 | UBA2266 sp002347125 |
| GCA_002364005.1 | 91.5% | 1.1% | 88.0% | 61.7% | 3.40 Mb | Phycisphaerales | SM1A02 | UBA1924 | UBA1924 sp002364005 |
| GCA_002364485.1 | 97.4% | 1.1% | 92.0% | 62.9% | 2.56 Mb | Phycisphaerales | SM1A02 | UBA854 | UBA854 sp002364485 |
| GCA_002364555.1 | 96.7% | 0.6% | 90.4% | 57.4% | 2.59 Mb | Phycisphaerales | SM1A02 | UBA1668 | UBA1668 sp002364555 |
| GCA_002418285.1 | 96.6% | 0.0% | 89.9% | 61.9% | 4.84 Mb | Phycisphaerales | SM1A02 | UBA5793 | UBA5793 sp002418285 |
| GCA_002480345.1 | 91.4% | 0.0% | 86.8% | 67.9% | 3.85 Mb | Phycisphaerales | SM1A02 | UBA1926 | UBA1926 sp002480345 |
| GCA_002480565.1 | 95.3% | 0.0% | 88.7% | 50.0% | 6.01 Mb | Phycisphaerales | Phycisphaeraceae | UBA7800 | UBA7800 sp002480565 |
| GCA_002591705.1 | 82.7% | 4.2% | 91.9% | 59.6% | 2.53 Mb | Phycisphaerales | SM1A02 | UBA854 | UBA854 sp002591705 |
| GCA_002683195.1 | 89.0% | 1.7% | 91.0% | 63.4% | 3.59 Mb | Phycisphaerales | SM1A02 | GCA-002862325 | GCA-002862325 sp002683195 |
| GCA_002684315.1 | 74.5% | 4.6% | 92.8% | 59.2% | 2.73 Mb | Phycisphaerales | SM1A02 | UBA8087 | UBA8087 sp002684315 |
| GCA_002684755.1 | 83.3% | 5.1% | 91.0% | 66.7% | 2.98 Mb | Phycisphaerales | SM1A02 | UBA12014 | UBA12014 sp002684755 |
| GCA_002686995.1 | 80.7% | 0.6% | 90.4% | 66.5% | 7.80 Mb | Phycisphaerales | Phycisphaeraceae | GCA-2686995 | GCA-2686995 sp002686995 |
| GCA_002689385.1 | 90.9% | 3.4% | 93.6% | 45.1% | 1.94 Mb | Phycisphaerales | SM1A02 | GCA-002718515 | GCA-002718515 sp002689385 |
| GCA_002690755.1 | 94.3% | 4.1% | 90.5% | 66.1% | 3.47 Mb | Phycisphaerales | SM1A02 | UBA12014 | UBA12014 sp002690755 |
| GCA_002700845.1 | 76.9% | 4.0% | 94.1% | 55.1% | 1.77 Mb | Phycisphaerales | SM1A02 | UBA8653 | UBA8653 sp002700845 |
| GCA_002702575.1 | 98.9% | 6.3% | 93.5% | 57.8% | 3.17 Mb | Phycisphaerales | SM1A02 | UBA1668 | UBA1668 sp002702575 |
| GCA_002704825.1 | 83.1% | 3.5% | 88.8% | 51.8% | 6.42 Mb | Phycisphaerales | Phycisphaeraceae | UBA7800 | UBA7800 sp002704825 |
| GCA_002706885.1 | 85.2% | 0.3% | 90.6% | 65.9% | 3.57 Mb | Phycisphaerales | SM1A02 | GCA-2706885 | GCA-2706885 sp002706885 |
| GCA_002709295.1 | 98.9% | 4.0% | 91.9% | 65.7% | 3.68 Mb | Phycisphaerales | SM1A02 | GCA-002862325 | GCA-002862325 sp002709295 |
| GCA_002709755.1 | 94.3% | 0.6% | 92.4% | 59.9% | 2.62 Mb | Phycisphaerales | SM1A02 | UBA8087 | UBA8087 sp002709755 |
| GCA_002711415.1 | 96.6% | 0.6% | 93.0% | 61.0% | 2.80 Mb | Phycisphaerales | SM1A02 | GCA-2711415 | GCA-2711415 sp002711415 |
| GCA_002716385.1 | 84.7% | 6.6% | 93.4% | 57.7% | 2.79 Mb | Phycisphaerales | SM1A02 | UBA1668 | UBA1668 sp002716385 |
| GCA_002716625.1 | 89.5% | 0.0% | 89.3% | 50.9% | 3.35 Mb | Phycisphaerales | Phycisphaeraceae | UBA6626 | UBA6626 sp002716625 |
| GCA_002717655.1 | 93.1% | 1.8% | 93.3% | 55.2% | 3.07 Mb | Phycisphaerales | SM1A02 | UBA1668 | UBA1668 sp002717655 |
| Table S1. Continued. | | | | | | | | | |
| GCA_002718515.1 | 85.5% | 6.3% | 94.8% | 45.3% | 1.95 Mb | Phycisphaerales | SM1A02 | GCA-002718515 | GCA-002718515 sp002718515 |
| GCA_002839495.1 | 88.1% | 3.4% | 89.0% | 45.5% | 1.83 Mb | Sedimentisphaerales | UBA12454 | UBA12454 | UBA12454 sp002839495 |
| GCA_002862305.1 | 97.7% | 2.3% | 92.3% | 68.0% | 2.67 Mb | Phycisphaerales | SM1A02 | UBA8087 | UBA8087 sp002862305 |
| GCA_002862325.1 | 82.6% | 1.8% | 91.9% | 64.9% | 2.44 Mb | Phycisphaerales | SM1A02 | GCA-002862325 | GCA-002862325 sp002862325 |
| GCA_003141275.1 | 96.0% | 3.5% | 88.6% | 49.2% | 3.05 Mb | Sedimentisphaerales | SG8-4 | Fen-1362 | Fen-1362 sp003141275 |
| GCA_003141315.1 | 96.6% | 1.1% | 88.7% | 47.7% | 2.35 Mb | Sedimentisphaerales | SG8-4 | Fen-1359 | Fen-1359 sp003141315 |
| GCA_003142595.1 | 97.7% | 1.1% | 90.3% | 44.0% | 2.28 Mb | Sedimentisphaerales | UBA12454 | UBA12454 | UBA12454 sp003142595 |
| GCA_003153655.1 | 89.6% | 2.3% | 89.4% | 57.0% | 4.65 Mb | Tepidisphaerales | Tepidisphaeraceae | PALSA-1353 | PALSA-1353 sp003153655 |
| GCA_003153915.1 | 79.8% | 2.3% | 88.1% | 62.4% | 2.63 Mb | SM23-33 | SM23-33 | FEN-1349 | FEN-1349 sp003153915 |
| GCA_003162245.1 | 94.7% | 6.8% | 87.6% | 67.1% | 4.76 Mb | UBA1845 | Fen-1342 | Fen-1342 | Fen-1342 sp003162245 |
| GCA_003170085.1 | 89.5% | 0.9% | 87.8% | 66.0% | 4.47 Mb | FEN-1346 | FEN-1346 | FEN-1346 | FEN-1346 sp003170085 |
| GCA_003170415.1 | 96.6% | 1.1% | 88.7% | 49.8% | 2.67 Mb | Sedimentisphaerales | SG8-4 | Fen-1362 | Fen-1362 sp003170415 |
| GCA_003171235.1 | 87.2% | 1.1% | 84.2% | 64.2% | 3.61 Mb | SM23-33 | SM23-33 | FEN-1344 | FEN-1344 sp003171235 |
| GCA_003171335.1 | 95.5% | 1.1% | 84.3% | 64.4% | 4.20 Mb | SM23-33 | FEN-1343 | FEN-1343 | FEN-1343 sp003171335 |
| GCA_003520025.1 | 82.9% | 0.0% | 89.8% | 60.5% | 2.13 Mb | Phycisphaerales | SM1A02 | UBA12567 | UBA12567 sp003520025 |
| GCA_003551645.1 | 95.5% | 2.3% | 87.7% | 63.5% | 2.83 Mb | SM23-33 | SM23-33 | PUND01 | PUND01 sp003551645 |
| GCA_003562195.1 | 89.2% | 4.0% | 91.2% | 57.8% | 2.75 Mb | Phycisphaerales | SM1A02 | PWVT01 | PWVT01 sp003562195 |
| GCA_003576875.1 | 89.8% | 0.0% | 89.3% | 63.5% | 3.36 Mb | UBA1845 | UTPLA1 | PLA3 | PLA3 sp003576875 |
| GCA_003576905.1 | 97.7% | 3.4% | 88.1% | 63.8% | 4.71 Mb | UBA1845 | UTPLA1 | UTPLA1 | UTPLA1 sp003576905 |
| GCA_003597935.1 | 72.7% | 4.0% | 84.8% | 67.3% | 4.30 Mb | UBA1845 | UBA1845 | SURF-32 | SURF-32 sp003597935 |
| GCA_003644175.1 | 82.7% | 1.2% | 88.3% | 53.6% | 2.51 Mb | Sedimentisphaerales | Anaerohalophaeraceae | B28-G16 | B28-G16 sp003644175 |
| GCA_003644205.1 | 77.8% | 1.7% | 89.1% | 48.7% | 2.64 Mb | Sedimentisphaerales | Anaerohalophaeraceae | QNBT01 | QNBT01 sp003644205 |
| GCA_003644295.1 | 77.1% | 3.9% | 89.5% | 45.7% | 1.82 Mb | Sedimentisphaerales | SG8-4 | B140-G9 | B140-G9 sp003644295 |
| GCA_003671025.1 | 95.5% | 0.6% | 90.4% | 60.3% | 3.25 Mb | Phycisphaerales | SM1A02 | QWPT01 | QWPT01 sp003671025 |
| GCA_003671055.1 | 96.6% | 2.8% | 92.1% | 58.2% | 2.85 Mb | Phycisphaerales | SM1A02 | F1-140-MAGs142 | F1-140-MAGs142 sp003671055 |
| GCA_003671065.1 | 76.1% | 0.0% | 92.7% | 58.5% | 2.45 Mb | Phycisphaerales | SM1A02 | QWPT01 | QWPT01 sp003671065 |
| GCA_003671075.1 | 93.2% | 0.6% | 91.0% | 63.0% | 3.35 Mb | Phycisphaerales | SM1A02 | QWPT01 | QWPT01 sp003671075 |
| GCA_003696675.1 | 95.5% | 2.3% | 90.7% | 66.0% | 3.28 Mb | Phycisphaerales | SM1A02 | UBA6054 | UBA6054 sp003696675 |
| Table S1. Continued. | | | | | | | | | |
| GCA_003696725.1 | 95.5% | 1.7% | 92.0% | 72.4% | 2.46 Mb | Phycisphaerales | SM1A02 | J020 | J020 sp003696725 |
| GCA_003697045.1 | 94.9% | 1.1% | 92.4% | 62.3% | 2.83 Mb | Phycisphaerales | SM1A02 | J022 | J022 sp003697045 |
| GCA_005223045.1 | 94.3% | 2.3% | 88.1% | 52.9% | 5.98 Mb | Sedimentisphaerales | SG8-4 | SG8-4 | SG8-4 sp005223045 |
| GCA_005240095.1 | 89.7% | 0.6% | 88.9% | 63.6% | 4.67 Mb | UBA1845 | UBA1845 | SBAX01 | SBAX01 sp005240095 |
| GCA_005776885.1 | 86.0% | 0.6% | 93.8% | 66.6% | 2.49 Mb | Phycisphaerales | SM1A02 | SXOD01 | SXOD01 sp005776885 |
| GCA_005787685.1 | 95.3% | 1.1% | 92.9% | 53.3% | 2.37 Mb | Phycisphaerales | SM1A02 | SYAC01 | SYAC01 sp005787685 |
| GCA_005789005.1 | 82.3% | 1.2% | 93.0% | 53.7% | 2.23 Mb | Phycisphaerales | SM1A02 | SYAC01 | SYAC01 sp005789005 |
| GCA_005790565.1 | 91.3% | 0.6% | 92.8% | 60.6% | 2.66 Mb | Phycisphaerales | SM1A02 | F1-140-MAGs142 | F1-140-MAGs142 sp005790565 |
| GCA_005790605.1 | 91.6% | 0.6% | 92.7% | 59.9% | 3.03 Mb | Phycisphaerales | SM1A02 | F1-140-MAGs142 | F1-140-MAGs142 sp005790605 |
| GCA_005792145.1 | 98.5% | 0.0% | 94.4% | 52.0% | 2.52 Mb | Phycisphaerales | SM1A02 | F1-60-MAGs104 | F1-60-MAGs104 sp005792145 |
| GCA_005798965.1 | 75.1% | 0.6% | 94.3% | 67.0% | 2.06 Mb | Phycisphaerales | SM1A02 | SYIB01 | SYIB01 sp005798965 |
| GCA_005799205.1 | 79.0% | 0.0% | 96.1% | 60.0% | 2.0 Mb | Phycisphaerales | SM1A02 | F1-60-MAGs104 | F1-60-MAGs104 sp005799205 |
| GCA_005799475.1 | 88.4% | 0.6% | 95.6% | 65.1% | 2.17 Mb | Phycisphaerales | SM1A02 | F1-60-MAGs104 | F1-60-MAGs104 sp005799475 |
| GCA_005799495.1 | 96.0% | 1.1% | 94.8% | 63.5% | 2.36 Mb | Phycisphaerales | SM1A02 | F1-60-MAGs104 | F1-60-MAGs104 sp005799495 |
| GCA_006969385.1 | 98.9% | 0.0% | 86.3% | 57.3% | 5.48 Mb | UBA1845 | UTPLA1 | ECT2AJA-110-A | ECT2AJA-110-A sp006969385 |
| GCA_007121565.1 | 79.5% | 1.2% | 88.9% | 57.3% | 1.72 Mb | Sedimentisphaerales | Anaerohalophaeraceae | T3Sed10-213 | T3Sed10-213 sp007121565 |
| GCA_007124345.1 | 73.9% | 2.7% | 90.0% | 67.2% | 2.87 Mb | Phycisphaerales | SM1A02 | SLFH01 | SLFH01 sp007124345 |
| GCA_007693725.1 | 92.1% | 0.0% | 91.1% | 64.8% | 2.71 Mb | Phycisphaerales | SM1A02 | REDD01 | REDD01 sp007693725 |
| GCA_007693765.1 | 93.3% | 0.0% | 88.7% | 69.7% | 2.90 Mb | Phycisphaerales | SM1A02 | RECZ01 | RECZ01 sp007693765 |
| GCA_007693785.1 | 95.5% | 1.1% | 88.2% | 69.4% | 3.06 Mb | Phycisphaerales | SM1A02 | RECY01 | RECY01 sp007693785 |
| GCA_007693845.1 | 94.0% | 4.0% | 88.5% | 61.3% | 3.26 Mb | Phycisphaerales | SM1A02 | SKZB01 | SKZB01 sp007693845 |
| GCA_007693965.1 | 97.7% | 0.0% | 87.9% | 65.8% | 3.48 Mb | Phycisphaerales | SM1A02 | RECQ01 | RECQ01 sp007693965 |
| GCA_007694925.1 | 91.5% | 0.0% | 90.0% | 68.1% | 2.99 Mb | Phycisphaerales | SM1A02 | SLFH01 | SLFH01 sp007694925 |
| GCA_007747445.1 | 94.3% | 0.0% | 84.1% | 48.7% | 4.29 Mb | Phycisphaerales | Phycisphaeraceae | Poriferasphaera | Poriferasphaera corsicensis |
| GCA_008363215.1 | 96.6% | 0.0% | 89.1% | 65.8% | 3.57 Mb | Phycisphaerales | SM1A02 | J022 | J022 sp008363215 |
| GCA_009691705.1 | 97.4% | 1.1% | 95.4% | 58.7% | 1.99 Mb | Phycisphaerales | SM1A02 | F1-60-MAGs104 | F1-60-MAGs104 sp009691705 |
| GCA_009691725.1 | 95.1% | 0.0% | 95.3% | 58.5% | 2.07 Mb | Phycisphaerales | SM1A02 | F1-60-MAGs104 | F1-60-MAGs104 sp009691725 |
| GCA_009691805.1 | 92.1% | 0.6% | 92.8% | 58.6% | 2.62 Mb | Phycisphaerales | SM1A02 | F1-140-MAGs142 | F1-140-MAGs142 sp009691805 |
| Table S1. Continued. | | | | | | | | | |
| GCA_009691915.1 | 96.2% | 0.0% | 95.2% | 63.6% | 2.27 Mb | Phycisphaerales | SM1A02 | F1-60-MAGs104 | F1-60-MAGs104 sp009691915 |
| GCA_009692015.1 | 88.3% | 0.0% | 95.5% | 60.4% | 1.74 Mb | Phycisphaerales | SM1A02 | F1-60-MAGs104 | F1-60-MAGs104 sp009692015 |
| GCA_009692045.1 | 96.2% | 1.1% | 94.9% | 60.3% | 2.17 Mb | Phycisphaerales | SM1A02 | SYPI01 | SYPI01 sp009692045 |
| GCA_009781185.1 | 91.5% | 1.1% | 87.2% | 57.0% | 4.65 Mb | Tepidisphaerales | WQYP01 | WQYP01 | WQYP01 sp009781185 |
| GCA_009827205.1 | 89.7% | 2.8% | 92.5% | 60.4% | 2.94 Mb | Phycisphaerales | SM1A02 | GCA-2732755 | GCA-2732755 sp009827205 |
| GCA_009827215.1 | 89.5% | 0.0% | 92.0% | 56.2% | 2.59 Mb | Phycisphaerales | SM1A02 | UBA1924 | UBA1924 sp009827215 |
| GCA_009908915.1 | 80.1% | 1.1% | 85.7% | 64.3% | 2.95 Mb | SM23-33 | SM23-33 | JAAAOJ01 | JAAAOJ01 sp009908915 |
| GCA_009926625.1 | 98.5% | 1.1% | 94.2% | 63.6% | 2.58 Mb | Phycisphaerales | SM1A02 | F1-60-MAGs104 | F1-60-MAGs104 sp009926625 |
| GCA_009926815.1 | 76.5% | 4.0% | 94.2% | 69.5% | 2.29 Mb | Phycisphaerales | SM1A02 | SYAC01 | SYAC01 sp009926815 |
| GCA_011048645.1 | 88.6% | 0.1% | 90.0% | 55.3% | 2.49 Mb | Sedimentisphaerales | Anaerohalophaeraceae | T3Sed10-213 | T3Sed10-213 sp011048645 |
| GCA_011054455.1 | 86.9% | 0.5% | 87.6% | 68.9% | 3.97 Mb | UBA1845 | Fen-1342 | DSPM01 | DSPM01 sp011054455 |
| GCA_011332905.1 | 97.7% | 1.1% | 93.3% | 55.7% | 2.87 Mb | Sedimentisphaerales | SG8-4 | DTPU01 | DTPU01 sp011332905 |
| GCA_011367345.1 | 96.6% | 0.0% | 91.4% | 67.1% | 4.28 Mb | Tepidisphaerales | Tepidisphaeraceae | DSYW01 | DSYW01 sp011367345 |
| GCA_011369955.1 | 100.0% | 1.1% | 90.4% | 67.0% | 3.88 Mb | UBA1845 | UTPLA1 | SpSt-539 | SpSt-539 sp011369955 |
| GCA_011370245.1 | 96.6% | 2.3% | 90.3% | 61.4% | 5.15 Mb | Tepidisphaerales | WQYP01 | SpSt-394 | SpSt-394 sp011370245 |
| GCA_011525745.1 | 97.7% | 1.1% | 83.4% | 65.3% | 5.40 Mb | UBA1845 | UTPLA1 | PLA4 | PLA4 sp011525745 |
| GCA_011525805.1 | 95.5% | 0.0% | 88.2% | 67.0% | 4.54 Mb | Phycisphaerales | SM1A02 | UBA5793 | UBA5793 sp011525805 |
| GCA_011682595.1 | 75.8% | 1.1% | 87.5% | 64.4% | 2.43 Mb | FEN-1346 | JAACEH01 | JAACEH01 | JAACEH01 sp011682595 |
| GCA_012514125.1 | 88.5% | 2.4% | 87.1% | 50.1% | 2.98 Mb | JAAYCJ01 | JAAYCJ01 | JAAZAW01 | JAAZAW01 sp012514125 |
| GCA_012517095.1 | 94.3% | 3.4% | 90.6% | 55.3% | 4.26 Mb | Sedimentisphaerales | Anaerohalophaeraceae | FEN-1350 | FEN-1350 sp012517095 |
| GCA_012719955.1 | 96.6% | 1.7% | 84.3% | 63.5% | 5.29 Mb | UBA1845 | PWPN01 | JAAXZI01 | JAAXZI01 sp012719955 |
| GCA_012729015.1 | 96.6% | 1.1% | 87.1% | 66.6% | 4.45 Mb | FEN-1346 | JAACEH01 | JAAYDY01 | JAAYDY01 sp012729015 |
| GCA_012729395.1 | 96.6% | 2.3% | 85.2% | 63.4% | 5.74 Mb | UBA1845 | PWPN01 | JAAYDF01 | JAAYDF01 sp012729395 |
| GCA_012729595.1 | 96.0% | 0.0% | 85.5% | 57.4% | 4.12 Mb | UBA1845 | PWPN01 | JAAYCU01 | JAAYCU01 sp012729595 |
| GCA_012729675.1 | 96.6% | 0.0% | 87.3% | 54.9% | 2.80 Mb | Sedimentisphaerales | Anaerohalophaeraceae | T3Sed10-213 | T3Sed10-213 sp012729675 |
| GCA_012729725.1 | 97.7% | 3.4% | 90.9% | 59.6% | 3.22 Mb | SM23-33 | SM23-33 | JAAYCO01 | JAAYCO01 sp012729725 |
| GCA_012729815.1 | 97.6% | 3.2% | 90.9% | 64.0% | 5.47 Mb | JAAYCJ01 | JAAYCJ01 | JAAYCJ01 | JAAYCJ01 sp012729815 |
| GCA_012744475.1 | 100.0% | 2.3% | 88.4% | 62.6% | 5.75 Mb | Sedimentisphaerales | SG8-4 | PLanc-01 | PLanc-01 sp012744475 |
| Table S1. Continued. | | | | | | | | | |
| GCA_012965315.1 | 94.4% | 2.8% | 94.5% | 43.2% | 1.91 Mb | Phycisphaerales | SM1A02 | GCA-002718515 | GCA-002718515 sp012965315 |
| GCA_013003065.1 | 96.4% | 1.3% | 90.2% | 68.7% | 4.57 Mb | Phycisphaerales | SM1A02 | JABDLI01 | JABDLI01 sp013003065 |
| GCA_013044065.1 | 73.5% | 0.0% | 87.7% | 56.7% | 2.80 Mb | Tepidisphaerales | WQYP01 | JABEVA01 | JABEVA01 sp013044065 |
| GCA_013044165.1 | 96.3% | 0.0% | 86.6% | 56.2% | 3.58 Mb | Tepidisphaerales | WQYP01 | JABEVB01 | JABEVB01 sp013044165 |
| GCA_013140575.1 | 94.9% | 2.3% | 85.1% | 63.4% | 5.05 Mb | UBA1845 | UBA1845 | JABFSN01 | JABFSN01 sp013140575 |
| GCA_013151185.1 | 93.5% | 0.0% | 87.2% | 56.6% | 3.71 Mb | UBA1845 | UBA1845 | UBA1845 | UBA1845 sp013151185 |
| GCA_013349435.1 | 90.9% | 3.4% | 86.9% | 48.4% | 3.14 Mb | Sedimentisphaerales | Anaerohalophaeraceae | QNBT01 | QNBT01 sp013349435 |
| GCA_013349615.1 | 89.4% | 1.2% | 87.7% | 49.0% | 3.77 Mb | Sedimentisphaerales | SG8-4 | CS2-K091 | CS2-K091 sp013349615 |
| GCA_013360675.1 | 96.6% | 0.0% | 91.2% | 67.3% | 2.92 Mb | Phycisphaerales | SM1A02 | JABWBB01 | JABWBB01 sp013360675 |
| GCA_013360695.1 | 92.1% | 5.1% | 88.7% | 66.5% | 3.84 Mb | Phycisphaerales | SM1A02 | JABWBC01 | JABWBC01 sp013360695 |
| GCA_013822085.1 | 89.4% | 0.0% | 89.1% | 73.1% | 2.26 Mb | Phycisphaerales | SM1A02 | WM-009 | WM-009 sp013822085 |
| GCA_014237965.1 | 85.4% | 0.6% | 90.9% | 63.3% | 3.03 Mb | Phycisphaerales | SM1A02 | UBA12014 | UBA12014 sp014237965 |
| GCA_014238125.1 | 96.6% | 4.7% | 94.2% | 44.0% | 2.07 Mb | Phycisphaerales | SM1A02 | GCA-002718515 | GCA-002718515 sp014238125 |
| GCA_014238205.1 | 96.6% | 0.0% | 93.8% | 58.0% | 2.44 Mb | Phycisphaerales | SM1A02 | SP202 | SP202 sp014238205 |
| GCA_014238785.1 | 96.0% | 0.6% | 93.9% | 45.1% | 1.81 Mb | Phycisphaerales | SM1A02 | GCA-002718515 | GCA-002718515 sp014238785 |
| GCA_014238965.1 | 95.5% | 1.7% | 93.8% | 56.9% | 2.60 Mb | Phycisphaerales | SM1A02 | JABAAC01 | JABAAC01 sp014238965 |
| GCA_014379105.1 | 76.1% | 0.0% | 89.5% | 59.7% | 4.0 Mb | Tepidisphaerales | Tepidisphaeraceae | Tepidisphaera | Tepidisphaera mucosa |
| GCA_014379385.1 | 87.6% | 4.0% | 88.1% | 66.3% | 3.12 Mb | Phycisphaerales | SM1A02 | JACMLW01 | JACMLW01 sp014379385 |
| GCA_014381305.1 | 93.2% | 1.7% | 93.5% | 45.4% | 1.88 Mb | Phycisphaerales | SM1A02 | GCA-002718515 | GCA-002718515 sp014381305 |
| GCA_014381385.1 | 93.8% | 4.0% | 94.3% | 45.7% | 1.89 Mb | Phycisphaerales | SM1A02 | GCA-002718515 | GCA-002718515 sp014381385 |
| GCA_014381555.1 | 96.6% | 1.7% | 94.2% | 43.8% | 1.99 Mb | Phycisphaerales | SM1A02 | GCA-002718515 | GCA-002718515 sp014381555 |
| GCA_014384025.1 | 94.3% | 4.6% | 87.1% | 46.3% | 6.69 Mb | Sedimentisphaerales | SG8-4 | NIOZ-UU13 | NIOZ-UU13 sp014384025 |
| GCA_014584315.1 | 96.6% | 0.0% | 91.0% | 70.2% | 3.33 Mb | Phycisphaerales | SM1A02 | CAADGN01 | CAADGN01 sp014584315 |
| GCA_900696425.1 | 97.7% | 0.0% | 89.4% | 67.3% | 3.62 Mb | Phycisphaerales | SM1A02 | CAADGA01 | CAADGA01 sp900696425 |
| GCA_900696465.1 | 98.9% | 0.0% | 88.8% | 61.6% | 4.14 Mb | UBA1845 | UTPLA1 | UTPLA1 | UTPLA1 sp900696465 |
| GCA_900696525.1 | 90.9% | 0.0% | 89.4% | 69.8% | 3.64 Mb | UBA1845 | Fen-1342 | CAADGL01 | CAADGL01 sp900696525 |
| GCA_900696535.1 | 95.5% | 1.1% | 88.3% | 69.0% | 4.24 Mb | UBA1845 | Fen-1342 | CAADGM01 | CAADGM01 sp900696535 |
| GCA_900696545.1 | 96.5% | 0.0% | 90.9% | 68.8% | 3.09 Mb | Phycisphaerales | SM1A02 | CAADGN01 | CAADGN01 sp900696545 |
| Table S1. Continued. | | | | | | | | | |
| GCA_900696685.1 | 93.8% | 8.0% | 89.5% | 65.8% | 4.32 Mb | Phycisphaerales | SM1A02 | UBA5793 | UBA5793 sp900696685 |
| GCA_903831295.1 | 93.8% | 2.3% | 92.8% | 53.2% | 2.48 Mb | Phycisphaerales | SM1A02 | SYAC01 | SYAC01 sp903831295 |
| GCA_903834785.1 | 97.7% | 3.5% | 86.9% | 65.9% | 4.32 Mb | Phycisphaerales | SM1A02 | CAILKP01 | CAILKP01 sp903834785 |
| GCA_903845195.1 | 95.5% | 3.4% | 87.0% | 59.2% | 4.62 Mb | Tepidisphaerales | WQYP01 | CAIMWO01 | CAIMWO01 sp903845195 |
| GCA_903847315.1 | 98.9% | 2.3% | 90.4% | 44.7% | 2.44 Mb | Sedimentisphaerales | UBA12454 | UBA12454 | UBA12454 sp903847315 |
| GCA_903857265.1 | 98.9% | 1.2% | 89.2% | 49.2% | 2.81 Mb | Sedimentisphaerales | SG8-4 | Fen-1362 | Fen-1362 sp903857265 |
| GCA_903861235.1 | 71.4% | 1.5% | 94.7% | 69.6% | 2.12 Mb | Phycisphaerales | SM1A02 | SYAC01 | SYAC01 sp903861235 |
| GCA_903871935.1 | 97.7% | 2.0% | 89.1% | 60.4% | 6.32 Mb | Tepidisphaerales | Tepidisphaeraceae | CAIQIQ01 | CAIQIQ01 sp903871935 |
| GCA_903891095.1 | 97.7% | 0.6% | 90.9% | 68.0% | 3.60 Mb | Phycisphaerales | SM1A02 | QWPT01 | QWPT01 sp903891095 |
| GCA_903892515.1 | 96.6% | 2.3% | 85.4% | 63.1% | 4.89 Mb | SM23-33 | SM23-33 | CAITIS01 | CAITIS01 sp903892515 |
| GCA_903905665.1 | 96.6% | 3.4% | 88.0% | 54.3% | 3.16 Mb | UBA1845 | UBA1845 | CAIVHJ01 | CAIVHJ01 sp903905665 |
| GCA_903911205.1 | 96.4% | 2.4% | 90.8% | 61.8% | 3.87 Mb | Phycisphaerales | SM1A02 | QWPT01 | QWPT01 sp903911205 |
| GCA_903914415.1 | 98.9% | 3.4% | 87.0% | 67.5% | 4.74 Mb | UBA1845 | Fen-1342 | Fen-1342 | Fen-1342 sp903914415 |
| GCA_903919715.1 | 96.2% | 0.0% | 94.2% | 53.9% | 2.90 Mb | Phycisphaerales | SM1A02 | F1-60-MAGs104 | F1-60-MAGs104 sp903919715 |
| GCA_903927725.1 | 91.5% | 3.4% | 93.6% | 67.7% | 2.51 Mb | Phycisphaerales | SM1A02 | SYIB01 | SYIB01 sp903927725 |
| GCA_903927855.1 | 89.0% | 3.5% | 89.3% | 47.6% | 2.05 Mb | Sedimentisphaerales | SG8-4 | CAIYOL01 | CAIYOL01 sp903927855 |
| GCA_903929885.1 | 97.7% | 0.0% | 90.2% | 68.4% | 3.56 Mb | Phycisphaerales | SM1A02 | UBA2402 | UBA2402 sp903929885 |
| GCA_903961015.1 | 93.9% | 1.1% | 93.8% | 51.4% | 2.88 Mb | Phycisphaerales | SM1A02 | F1-60-MAGs104 | F1-60-MAGs104 sp903961015 |
| TNR_A1* | 83.8% | 2.8% | 88.1% | 66.6% | 4.73 Mb | Phycisphaerales | SM1A02 | UBA5793 | TNR_A1 |
| TNR_A2* | 84.7% | 2.3% | 88.7% | 62.9% | 4.01 Mb | UBA1845 | UTPLA1 | PLA3 | TNR_A2 |
| TNR_N1* | 82.1% | 1.0% | 91.4% | 67.4% | 3.61 Mb | Phycisphaerales | SM1A02 | SYAC01 | TNR_N1 |
| TNR_N2* | 80.0% | 0.6% | 90.3% | 70.3% | 3.51 Mb | Phycisphaerales | SM1A02 | NA | TNR_N2 |
| TNR_N3* | 85.5% | 1.2% | 87.7% | 62.4% | 5.16 Mb | UBA1845 | UTPLA1 | NA | TNR_N3 |
| TNR_N4* | 92.1% | 1.8% | 88.5% | 60.9% | 4.93 Mb | UBA1845 | UTPLA1 | UTPLA1 | TNR_N4 |

| Table S2. dbCAN4 grouping of glycans with similar structural features. This table has been copied from J. Zheng, Q. Ge, Y. Yan, X. Zhang, L. Huang, Y. Yin, dbCAN3: automated carbohydrate-active enzyme and substrate annotation. Nucleic Acids Res. 51, W115–W121 (2023). | | | |
| --- | --- | --- | --- |
| Glycan | **Description** | **Organisms** | **Similar to** |
| agarose | D-galactose (G) and 3,6-anhydro-L-galactose (L-AHG), G and L-AHG linked by β-(1−4) glycosidic bonds to form a disaccharide-repeating unit, which is then linked by α-(1−3) linkages | red algae | galactan |
| carrageenan | disaccharide-repeating unit same as agarose but sulphated galactan | red algae | galactan |
| porphyran | G and L-galactose-6-sulfate (L-G6S), G and L-G6S linked by β-1,4 linkage to form a disaccharide-repeating unit of G-1,4-(L-G6S), which is then linked by α-1,3 linkage | red algae | galactan |
| ulvan | sulphated rhamnose-3-sulfate (Rha3S) + another sugar forming disaccharide-repeating unit, β-D-GlcA-1,4-α-L-Rha3S, β-L-IdoA-1,4-α-L-Rha3S, β-D-Xyl-1,4-α-L-Rha3S, β-D-Xyl2S-1,4-α- L Rha3S | green algae | polyRha |
| laminarin | β-1,3-linked-D-glucopyranose backbone with β-1,6-linked-D-glucopyranose as a branched chain | brown algae | beta-glucan |
| alginate | β-1,4-D-mannuronic acid (MnA) and α-1,4- L-guluronic acid (GlcA), disaccharide-repeating unit by a 1,4 linkage and arranged as polyMnA, polyGlcA, or polyMnAGlcA blocks | brown algae | polyGlcA |
| fucoidan | highly sulphated polysaccharide, fucose-containing sulfated polysaccharide, α-1,3 linkages and α-1,4 linkages alternately linked with α- L-fucose backbone, and then mannose, galactose, or glucuronic acid to form the branches of the sulphated L-fucose chain | brown algae | polyfucose |
| xylan | β-1,4-xylose backbone with reducing end tetrasaccharide sequence (rhamnose, GalA, xylose), side chains contain arabinose, GlcA, arabinoxylan, glucuronoxylan, glucuronoarabinoxylan | plants and algae | xylan |
| arabinogalactan | beta-galactan backbone and side chain, side chains also contain arabinan, rhamnose, fucose, GlcA, xylose | plants and algae | galactan, arabinan |
| cellulose | β-1,4-glucose | plants and algae | beta-glucan |
| beta-mannan | β-1,4-mannose and β-1,4-glucose backbone, side chain contains galactose | plants and algae | beta-mannan, galactomannan, glucomannan, galactoglucomannan |
| mixed-linkage glucan | β-1,3-1,4-glucose | plants and algae | beta-glucan |
| xyloglucan | β-1,4-glucose backbone, side chains contain xylose, arabinose, galactose, GalA, fucose | plants and algae | beta-glucan |
| Table S2. Continued. | | | |
| lichenin | β-1,3-1,4-glucose, also known as lichenan or moss starch | lichen (algae, bacteria, fungi composite) | beta-glucan |
| callose | β-1,3-glucose | plants and algae | beta-glucan |
| homogalacturonan | α-1,4-D-galacturonic acid (GalA) | plants and algae | pectin |
| rhamnogalacturonan I | α-linked GalA and Rha disaccharide-repeating unit backbone, side chains include beta-galactan and arabinan, also GlcA and fucose | plants and algae | pectin, galactan, arabinan |
| rhamnogalacturonan II | α-1,4-D-galacturonic acid (GalA) backbone, side chains include arabinose, Dha, Kdo, Rha, apiose, GalA, galactose, xylose, arabinose, fucose | plants and algae | pectin, galactan, arabinan |
| isolichenan | α-1,3-1,4-glucose, also known as isolichenin, cold-water-soluble α-glucan occurring in certain species of lichens | lichen (algae, bacteria, fungi composite) | alpha-glucan |
| starch | α-1,4-glucose with α-1,6 side chain | plants and algae | alpha-glucan |
| alpha-galactan | α-1,4 linked galactose and N-acetylgalactosamine (GalNAc) of exopolysaccharide galactosaminogalactan (fungal GAG), α-galactooligosaccharides (α-GOSs) from plants, also melibiose and raffinose that contain alpha-galactoside | fungi and plant | alpha-galactan, melibiose, raffinose |
| alpha-glucan | starch, glycogen, and malto-oligosaccharides, dextrin, dextran from bacteria, maltose, pullulan, isolichenan, nigerose, trehalose, kojibiose | starch, glycogen |
| sucrose | α-1,2 linked glucose and fructose | plants and algae | fructan |
| alpha-mannan | α-1,6- and α-1,2-D-mannose backbone | fungi and algae | galactomannan, arabinomannan |
| arabinan | can be found in hydroxyproline-rich glyoproteins (arabinan in extensin and lectin), arabinoxylan, arabinogalactans, pectins | plants and algae | arabinogalactans, pectins |
| chitin | polymer of β-1,4-N-acetylglucosamine | fungi and insects | chitosan |
| fructan | polymer of β-linked fructose with a terminal glucose | plants, bacteria, fungi, algae | inulin, levan, sucrose |
| exo-polysaccharide | diverse polysaccharides on the cell surface of microbes | bacteria, fungi, archaea | capsular polysaccharide, lipopolysaccharides |
| galactosaminogalactan | exopolysaccharide composed of galactose and N-acetylgalactosamine (GalNAc). It is commonly found in the biofilm and cell wall of various fungal species | fungi | exo-polysaccharide |
| Table S2. Continued. | | | |
| host glycan | broad class of diverse glycans usually connected with proteins or lipids and contain modified mono-sugars such as amino-sugars, e.g., mucin (contain N-acetylgalactosamine (GalNAc), N-acetylglucosamine (GlcNAc), N-acetylneuraminic acid (NeuAc or sialic acid), galactose (Gal), and fucose (Fuc)), hyaluronan, lactose, LacNAc, mucin, blood group B substances, glycosphingolipid, sialic acid, glycosaminoglycan, mucin-type O-glycans, N-glycans, keratan sulfate, human milk oligosaccharides, human milk polysaccharides, heparan sulfate proteoglycans, sulfated glycosaminoglycans, heparin and heparan sulfate, dermatan sulfate | animals, plants | mucin, O-glycans, N-glycans |
| peptidoglycan | long polymers of disaccharides, each containing an N-acetylmuramic acid (MurNAc) and N-acetylglucosamine (GlcNAc) residue, that are linked by β-1,4 glycosidic bonds | bacteria | peptidoglycan |
